# Supplementary material for: One-pot synthesis of polyamines improved magnetism and fluorescence Fe3O4–carbon dots hybrid NPs for dual modal imaging
Source: Royal Society of Chemistry journal article supplement (doi:10.1039/c5dt04488j), 2016-01-01
Supplement: c5dt04488j1.pdf [file c5dt04488j1.pdf]

# One-pot Synthesis Polyamines Improved Magnetism and Fluorescence Fe<sub>3</sub>O<sub>4</sub>-Carbon Dots Hybrid NPs for Dual Modal Imaging

Bo Li,<sup>a,b</sup> Xudong Wang,<sup>a</sup> Yali Guo,<sup>a</sup> Anam Iqbal,<sup>a</sup> Yaping Dong,<sup>b</sup> Wu Li,<sup>b</sup> Weisheng Liu<sup>a</sup>, Wenwu Qin<sup>a\*</sup>, Shizhen Chen<sup>c</sup>, Xin Zhou<sup>c</sup>, Yunhuang Yang<sup>c</sup>

Oct 30, 2015

a B. Li, X. D. Wang, Y. L. Guo, A. Iqbal, Prof W. S. Liu, Prof W. W. Qin

Key Laboratory of Nonferrous Metal Chemistry and Resources Utilization of Gansu Province Lanzhou University, Lanzhou, 730000 (P.R. China) Fax: (+86) 931-8912582 E-mail: qinww@lzu.edu.cn

b B. Li, Prof Y. P. Dong, Prof W. Li

Qinghai Institute of Salt Lakes, Chinese Academy of Sciences, Xining, Qinghai 810008, (P.R. China).

c Prof S Chen, Prof X Zhou, Prof Y. H. Yang

Key Laboratory of Magnetic Resonance in Biological Systems, State Key Laboratory of Magnetic Resonance and Atomic and Molecular Physics, National Center for Magnetic Resonance in Wuhan, Wuhan Institute of Physics and Mathematics, Chinese Academy of Sciences, Wuhan 430071, China. E-mail: yang\_yh@wipm.ac.cn

---

\* Corresponding author: Fax: +86-931-8912582 E-mail address: [qinww@lzu.edu.cn](mailto:qinww@lzu.edu.cn) (W. Qin); [yang\\_yh@wipm.ac.cn](mailto:yang_yh@wipm.ac.cn) (Y. Yang);

## **S1. EXPERIMENTAL SECTION**

### **S1.1 Preparation of TETA-CDs**

0.105g CA was dissolved in H<sub>2</sub>O and triethylenetetramine (TETA) 10 mL (volume ratio 9:1). The precursor solution was transferred to a 20 ml Teflon-lined stainless steel autoclave. After sealing, the autoclave was heated to and maintained at 200 °C for 6 h. The autoclave was then cooled naturally to room temperature. The obtained Yellow transparent solution was label as TETA-CDs solution.

### **S1.2 Preparation of CA-CDs**

0.105g CA was dissolved in H<sub>2</sub>O 10 ml. The precursor solution was transferred to a 20 ml Teflon-lined stainless steel autoclave. After sealing, the autoclave was heated to and maintained at 200 °C for 6 h. The autoclave was then cooled naturally to room temperature. The obtained transparent solution was label as CA-CDs solution.

### **S1.3 Preparation of N-CDs**

0.105g CA and 0.09g Urea was dissolved in H<sub>2</sub>O 10 ml. The precursor solution was transferred to a 20 ml Teflon-lined stainless steel autoclave. After sealing, the autoclave was heated to and maintained at 200 °C for 6 h. The autoclave was then cooled naturally to room temperature. The obtained Yellow transparent solution was label as N-CDs solution.

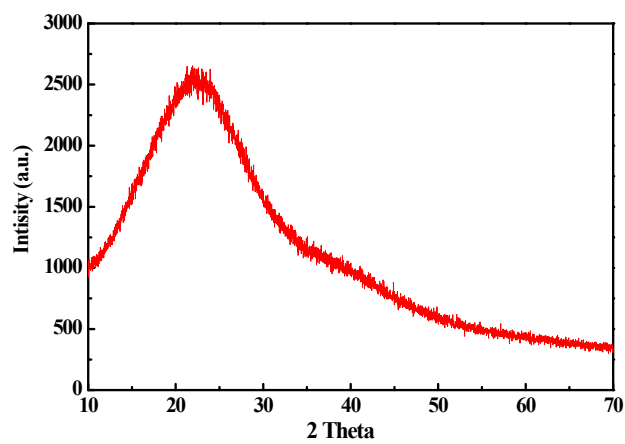

**Figure S1.** XRD patterns of TETA-CDs with hydrothermal time 6 h at 200 °C.

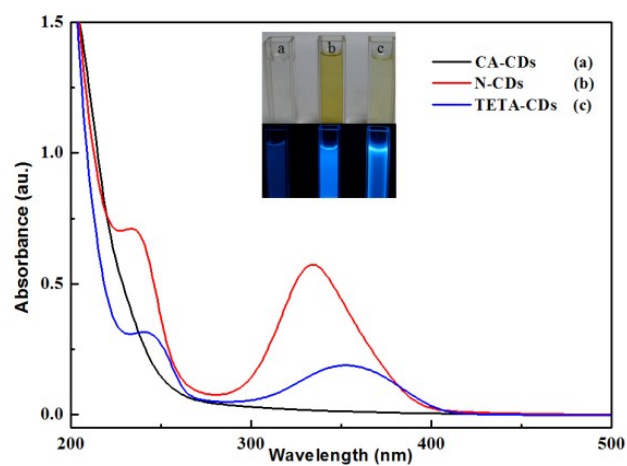

**Figure S2.** UV-vis absorption spectra of CA-CDs, N-CDs and TETA-CDs in water.

The inset is the samples under day light and UV lamp (the excitation wavelength is 365 nm).

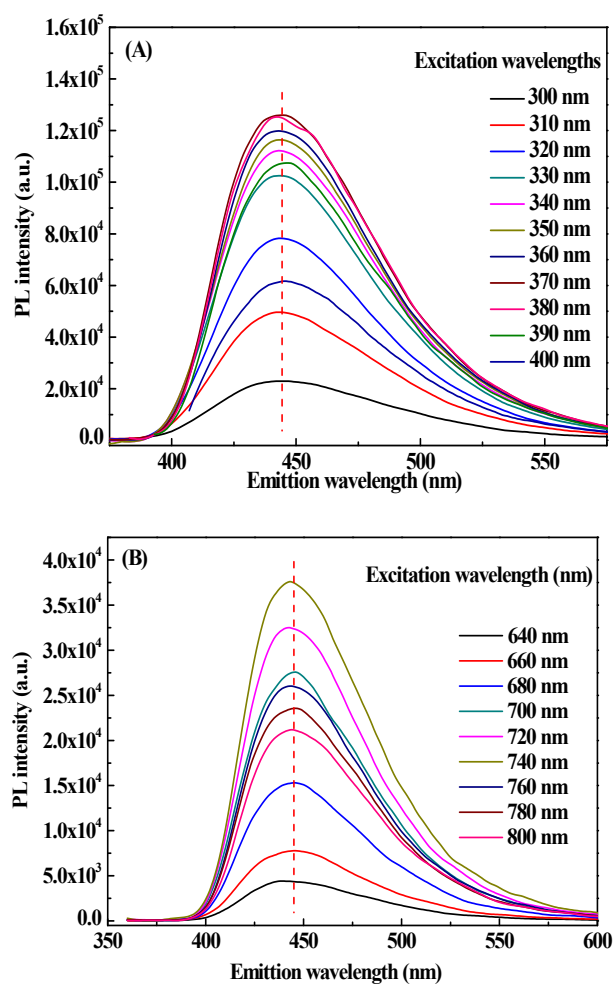

**Figure S3** Fluorescence spectra of the TETA-CDs different excitation wavelengths: down-conversion (A) and up-conversion (B).

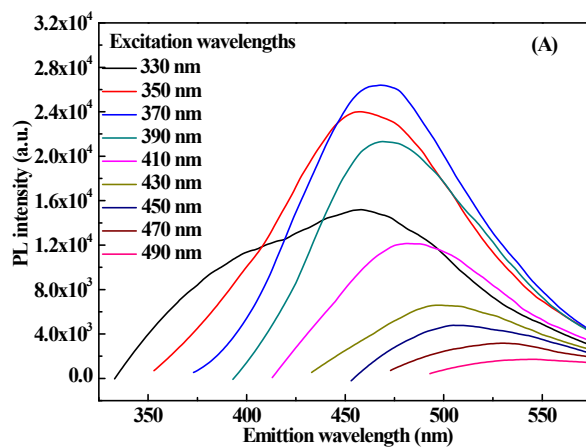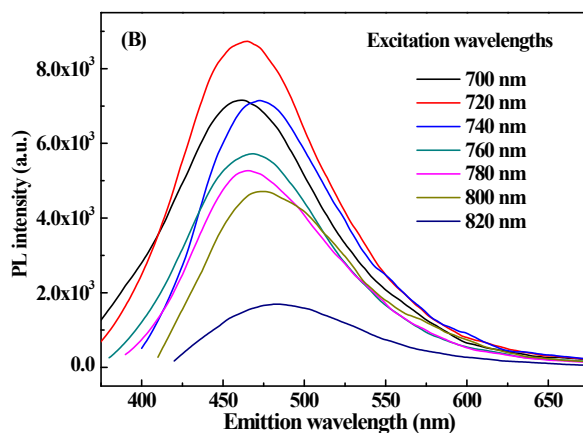

**Figure S4** Fluorescence spectra of the CA-CDs different excitation wavelengths: down-conversion (A) and up-conversion (B).

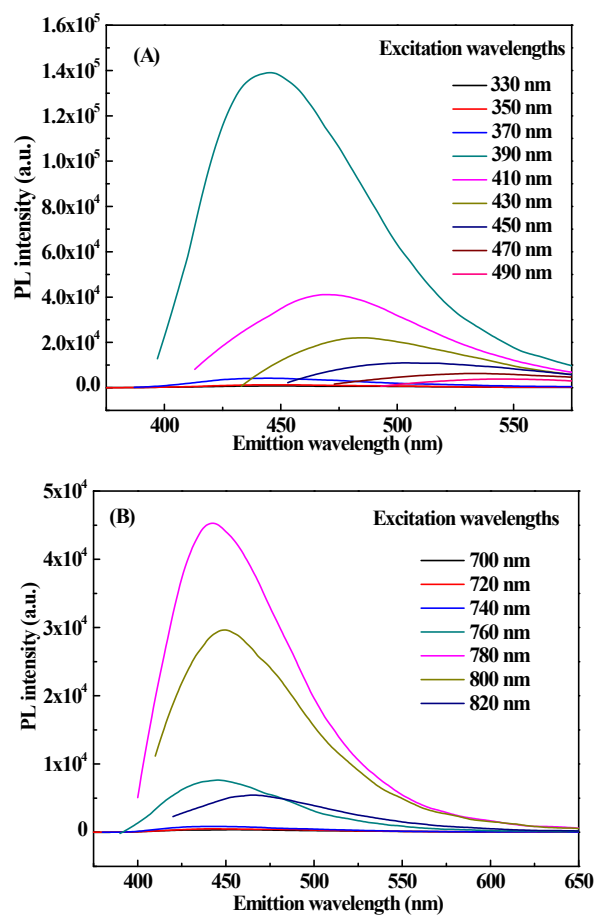

**Figure S5** Fluorescence spectra of the N-CDs different excitation wavelengths: down-conversion (A) and up-conversion (B).

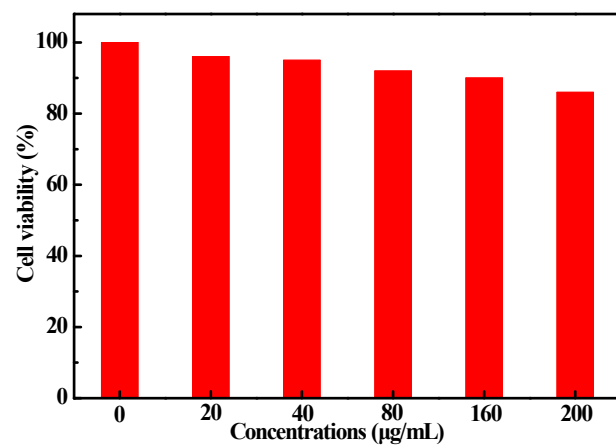

**Figure S6.** Effects of Fe<sub>3</sub>O<sub>4</sub>-CDs at varied concentrations on the viability of BHK cells.



**Table S1** Photophysical Properties of TETA-CDs and Fe<sub>3</sub>O<sub>4</sub>-CDs. Decay times  $\tau_1$ ,  $\tau_2$  and  $\tau_3$ , and the relative amplitude (%).

| Compound                            | Monitored Emission Wavelength/nm | $\tau_1$ /ns   | $\tau_2$ /ns | $\tau_3$ /ns |
|-------------------------------------|----------------------------------|----------------|--------------|--------------|
| TETA-CDs                            | 440                              | 13.76(38.89%)  | 5.45(46.13%) | 0.77(14.99%) |
|                                     | 460                              | 13.78(40.21%)  | 5.37(45.74%) | 0.69(14.05%) |
|                                     | 480                              | 14.13(38.77%)  | 5.49(47.25%) | 0.69(13.98%) |
| Fe <sub>3</sub> O <sub>4</sub> -CDs | 440                              | 12.84(34.14%)  | 5.31(65.86%) |              |
|                                     | 460                              | 13.04 (31.59%) | 5.38(68.41%) |              |
|                                     | 480                              | 12.73 (30.96%) | 5.42(69.04%) |              |
